# Supplementary material
Source: MDPI journal article supplement (https://www.mdpi.com/2071-1050/14/3/1728)
Supplement: s1 [file s1]

**Table S1.** Identification of socioeconomic and demographic conditions of food handlers and Characteristics of school functioning (Brazilian-Portuguese / English).

|                                                                                                                            |                                                                                                                                                                                                                             |                                                                                                        |
|----------------------------------------------------------------------------------------------------------------------------|-----------------------------------------------------------------------------------------------------------------------------------------------------------------------------------------------------------------------------|--------------------------------------------------------------------------------------------------------|
| <b>1. Características Funcionais das Escolas / School characteristics</b>                                                  |                                                                                                                                                                                                                             |                                                                                                        |
| Data / Date :                                                                                                              |                                                                                                                                                                                                                             |                                                                                                        |
| Responsável / Responsible :                                                                                                |                                                                                                                                                                                                                             |                                                                                                        |
| Roteiro de Visita N° / Script number _____                                                                                 |                                                                                                                                                                                                                             |                                                                                                        |
| Escola / School: _____                                                                                                     | GRE / Regional Education Management: _____                                                                                                                                                                                  |                                                                                                        |
| Gestor / Manager: _____                                                                                                    | NUTRICIONISTA SMED / Dietitian: _____                                                                                                                                                                                       |                                                                                                        |
| Modalidade de Ensino / Grade:                                                                                              | <input type="checkbox"/> PRÉ-ESCOLA / kindergarden<br><input type="checkbox"/> FUNDAMENTAL I / elementary school I<br><input type="checkbox"/> FUNDAMENTAL II / middle school<br><input type="checkbox"/> EJA / high school |                                                                                                        |
| Turnos de funcionamento / working shift:                                                                                   | <input type="checkbox"/> Matutino / morning<br><input type="checkbox"/> Vespertino / afternoon<br><input type="checkbox"/> Noturno / evening                                                                                | N° alunos / number of students:                                                                        |
| Tipo de serviço / Foodservice type:                                                                                        | <input type="checkbox"/> Autogestão / self-management<br><input type="checkbox"/> Terceirização / outsourced<br>Empresa / Company name: _____                                                                               |                                                                                                        |
| N° de refeições por período / number of meals:                                                                             |                                                                                                                                                                                                                             |                                                                                                        |
| Manhã / morning _____ Tarde / afternoon _____ Noite / evening _____                                                        |                                                                                                                                                                                                                             |                                                                                                        |
|                                                                                                                            |                                                                                                                                                                                                                             |                                                                                                        |
| <b>Perfil socioeconômico dos manipuladores de alimentos das UANE (Bloco 1) / Foodhandlers socioeconomic data (Block 1)</b> |                                                                                                                                                                                                                             |                                                                                                        |
|                                                                                                                            |                                                                                                                                                                                                                             |                                                                                                        |
| Nome / name:                                                                                                               | Idade / age: _____<br>Data nascimento / Birthday: ____/____/____                                                                                                                                                            | Sexo / Sex:<br><input type="checkbox"/> Masculino / male<br><input type="checkbox"/> Feminino / female |

|                                                                                                                                                                                                                                                                                                                                                                                                                                                          |                                                                                                                                                                            |
|----------------------------------------------------------------------------------------------------------------------------------------------------------------------------------------------------------------------------------------------------------------------------------------------------------------------------------------------------------------------------------------------------------------------------------------------------------|----------------------------------------------------------------------------------------------------------------------------------------------------------------------------|
| Escolaridade / <i>education level</i> :<br><input type="checkbox"/> Ensino fundamental incompleto / <i>incomplete elementary school</i><br><input type="checkbox"/> Ensino fundamental completo / <i>complete middle school</i><br><input type="checkbox"/> Ensino médio incompleto / <i>incomplete high school</i><br><input type="checkbox"/> Ensino médio completo / <i>complete high school</i><br><input type="checkbox"/> Outros / <i>others</i> : |                                                                                                                                                                            |
| Função registrada na carteira de trabalho / <i>occupation</i> : _____                                                                                                                                                                                                                                                                                                                                                                                    | Seu regime de trabalho é intermitente? / <i>Is your work regime intermittent?</i><br><input type="checkbox"/> Sim / <i>yes</i><br><input type="checkbox"/> Não / <i>no</i> |
| Há quanto tempo trabalha como merendeira? / <i>How long have you been working as a cook?</i><br><input type="checkbox"/> < 1 Ano / <i>year</i><br><input type="checkbox"/> 1-5 Anos / <i>years</i><br><input type="checkbox"/> 5-10 Anos / <i>years</i><br><input type="checkbox"/> > 10 Anos / <i>years</i><br>Especifique / <i>detail</i> : _____                                                                                                      |                                                                                                                                                                            |
| Você é funcionário(a) de empresa terceirizada? / <i>are you an employee of an outsourced company?</i><br><input type="checkbox"/> Sim / <i>yes</i><br><input type="checkbox"/> Não / <i>no</i>                                                                                                                                                                                                                                                           |                                                                                                                                                                            |
| Jornada de trabalho em horas / <i>Daily work hours</i> : <input type="checkbox"/> < 6 horas / <i>hours</i> <input type="checkbox"/> 6 - 8 horas / <i>hours</i> <input type="checkbox"/> > 8 horas / <i>hours</i>                                                                                                                                                                                                                                         |                                                                                                                                                                            |
| Renda em salário-mínimo (SM) / <i>income (mean-wage MW)</i> :<br><input type="checkbox"/> 1 SM (MW)<br><input type="checkbox"/> 1 ½ SM (MW)<br><input type="checkbox"/> 2 SM (MW)<br><input type="checkbox"/> 3 SM (MW)<br><input type="checkbox"/> > 3 SM (MW)                                                                                                                                                                                          |                                                                                                                                                                            |
| Você foi contratado (a) como merendeiro (a)? / <i>were you hired as a cook?</i><br><input type="checkbox"/> Sim / <i>yes</i><br><input type="checkbox"/> Não / <i>no</i>                                                                                                                                                                                                                                                                                 |                                                                                                                                                                            |
| Você considera o seu salário adequado para sua função? / <i>Do you consider your salary adequate for your role?</i><br><input type="checkbox"/> Sim / <i>yes</i><br><input type="checkbox"/> Não / <i>no</i>                                                                                                                                                                                                                                             |                                                                                                                                                                            |

|                                                                                                                                                                                                                                                                                                                    |
|--------------------------------------------------------------------------------------------------------------------------------------------------------------------------------------------------------------------------------------------------------------------------------------------------------------------|
| Se tivesse oportunidade você mudaria de função? / <i>If you could, would you change your role?</i><br><input type="checkbox"/> Sim / <i>yes</i><br><input type="checkbox"/> Não / <i>no</i><br><input type="checkbox"/> Talvez / <i>maybe</i>                                                                      |
| Na sua opinião, quantos profissionais seriam necessários para realizar as suas funções? / <i>In your opinion, how many professionals would be needed to perform your occupation?</i> _____                                                                                                                         |
| Já participou de algum treinamento sobre riscos ocupacionais? <i>Have you ever participated in any training on occupational hazards?</i><br><input type="checkbox"/> Sim / <i>yes</i><br><input type="checkbox"/> Não / <i>no</i><br>Quando foi o último treinamento? / <i>When was the last training?</i> : _____ |
| Já participou de algum treinamento sobre Higiene de Alimentos? <i>Have you participated in any training on Food Hygiene?</i><br><input type="checkbox"/> Sim / <i>yes</i><br><input type="checkbox"/> Não / <i>no</i><br>Quando foi o último treinamento / <i>When was the last training?</i> : _____              |

**Table S2.** Food handlers' knowledge and attitudes about food hygiene (Brazilian-Portuguese / English).

| Bloco 1. Conhecimento sobre a Higiene de Alimentos / Block 1. Knowledge about Food Hygiene |                                                                                                                                                                                                                                                                  | Discor<br>do<br>totalme<br>nte<br>/ I<br>totally<br>disagre<br>e | Discordo<br>parcialm<br>ente<br>/ I<br>partially<br>disagree | Não<br>concor<br>do e<br>nem<br>discor<br>do<br>/ I<br>neithe<br>r agree<br>nor<br>disagr<br>ee | Concord<br>o<br>parcialm<br>ente<br>/ I<br>partially<br>agree | Concor<br>do<br>totalme<br>nte<br>/ I<br>totally<br>agree |
|--------------------------------------------------------------------------------------------|------------------------------------------------------------------------------------------------------------------------------------------------------------------------------------------------------------------------------------------------------------------|------------------------------------------------------------------|--------------------------------------------------------------|-------------------------------------------------------------------------------------------------|---------------------------------------------------------------|-----------------------------------------------------------|
| 1                                                                                          | Os alimentos quentes preparados pela manhã poderão ficar sobre o fogão desligado ou a bancada para serem servidos na refeição seguinte. / <i>Hot foods prepared in the morning can be left in the kitchen at room temperature to be served on the next meal.</i> |                                                                  |                                                              |                                                                                                 |                                                               |                                                           |

|                                                                                               |                                                                                                                                                                                                                                                         |                                                 |                                                     |                                    |                                                  |                            |
|-----------------------------------------------------------------------------------------------|---------------------------------------------------------------------------------------------------------------------------------------------------------------------------------------------------------------------------------------------------------|-------------------------------------------------|-----------------------------------------------------|------------------------------------|--------------------------------------------------|----------------------------|
| 2                                                                                             | Eu conheço ou já ouvi falar sobre as doenças: salmonelose, shigelose, botulismo, cólera e hepatite A. / <i>I know or have heard about the diseases: salmonellosis, shigellosis, botulism, staphylococcosis, cholera and hepatitis A.</i>                |                                                 |                                                     |                                    |                                                  |                            |
| 3                                                                                             | Entre os sintomas de infecção intestinal estão: febre, dor de barriga, diarreia, vômitos e náuseas. / <i>Among the symptoms of intestinal infection are: fever, stomach pain, diarrhea, vomiting and nausea.</i>                                        |                                                 |                                                     |                                    |                                                  |                            |
| 4                                                                                             | Para evitar a contaminação dos alimentos eu lavo minhas mãos antes de começar a prepará-los. / <i>To avoid food contamination I wash and disinfect my hands before starting to prepare food.</i>                                                        |                                                 |                                                     |                                    |                                                  |                            |
| 5                                                                                             | O termômetro é usado para saber a temperatura dos alimentos prontos na UAN escolar. / <i>The thermometer is used to know the temperature of ready-to-eat foods in the school foodservice.</i>                                                           |                                                 |                                                     |                                    |                                                  |                            |
| 6                                                                                             | A UAN escolar deve ser limpa apenas no final do dia. / <i>School food service should only be cleaned at the end of the day.</i>                                                                                                                         |                                                 |                                                     |                                    |                                                  |                            |
| 7                                                                                             | O frango ou as carnes ou os peixes podem ser descongelados numa bacia com água fora da geladeira ou ao sol ou na temperatura ambiente. / <i>Meat can be defrosted in a bowl of water outside the refrigerator or in the sun or at room temperature.</i> |                                                 |                                                     |                                    |                                                  |                            |
| 8                                                                                             | O alimento contaminado sempre terá alguma alteração na cor, cheiro ou sabor. / <i>Contaminated food will always have some change in color, smell or taste.</i>                                                                                          |                                                 |                                                     |                                    |                                                  |                            |
| 9                                                                                             | É necessário a contratação de uma empresa para matar os ratos, as baratas e outros insetos na UAN escolar. / <i>It is necessary to hire a company to kill rats and insects in the school foodservice.</i>                                               |                                                 |                                                     |                                    |                                                  |                            |
| 10                                                                                            | Os legumes, as frutas, as verduras e as carnes podem ser cortados na mesma tábua ou placa de plástico. / <i>Vegetables, fruits, and meats can be cut on the same cutting board or plastic plate.</i>                                                    |                                                 |                                                     |                                    |                                                  |                            |
| 11                                                                                            | É necessário colocar a data de validade nas embalagens dos alimentos que foram abertas, mas não foram totalmente utilizadas. / <i>It is necessary to put the expiration date on food packages that have been opened but not fully used.</i>             |                                                 |                                                     |                                    |                                                  |                            |
| 12                                                                                            | Os funcionários da UAN escolar devem realizar exames de sangue, fezes e urina todos os anos. / <i>School food handlers must perform blood, stool, and urine tests every year.</i>                                                                       |                                                 |                                                     |                                    |                                                  |                            |
| 13                                                                                            | A secagem dos utensílios deve ser realizada com panos de pratos. / <i>The drying of utensils must be carried out with dish cloths.</i>                                                                                                                  |                                                 |                                                     |                                    |                                                  |                            |
| 14                                                                                            | A água filtrada é utilizada na preparação dos sucos e na lavagem de frutas. / <i>Filtered water is used to prepare juices and wash fruits.</i>                                                                                                          |                                                 |                                                     |                                    |                                                  |                            |
|                                                                                               |                                                                                                                                                                                                                                                         |                                                 |                                                     |                                    |                                                  |                            |
| <b>Bloco 2. Atitudes sobre a Higiene de Alimentos / Block 2. Attitudes about Food Hygiene</b> |                                                                                                                                                                                                                                                         | <b>Discordo totalmente / I totally disagree</b> | <b>Discordo parcialmente / I partially disagree</b> | <b>Não concordo e nem discordo</b> | <b>Concordo parcialmente / I partially agree</b> | <b>Concordo totalmente</b> |

|    |                                                                                                                                                                                                                                                                                        | <i>disagree</i> |  | <i>/ I neither agree nor disagree</i> | <i>/ I totally agree</i> |
|----|----------------------------------------------------------------------------------------------------------------------------------------------------------------------------------------------------------------------------------------------------------------------------------------|-----------------|--|---------------------------------------|--------------------------|
| 15 | Eu devo aprender os procedimentos para evitar a contaminação dos alimentos. / <i>I must learn the procedures to avoid food contamination.</i>                                                                                                                                          |                 |  |                                       |                          |
| 16 | Eu devo limpar as bancadas ou as mesas de trabalho ao final de cada turno para evitar a contaminação dos alimentos. / <i>I must clean benches or worktables at the end of each shift to prevent food contamination.</i>                                                                |                 |  |                                       |                          |
| 17 | Eu posso guardar os alimentos prontos com os alimentos crus. / <i>I can store ready-to-eat foods with raw foods.</i>                                                                                                                                                                   |                 |  |                                       |                          |
| 18 | Eu posso guardar os alimentos, na despensa, dentro das caixas de papelão e dos sacos plásticos para evitar a contaminação por ratos, baratas e formigas. / <i>I can store food in the pantry inside cardboard boxes and plastic bags to avoid contamination from rats and insects.</i> |                 |  |                                       |                          |
| 19 | Eu devo limpar a lixeira todos os dias. / <i>I must clean the trash every day.</i>                                                                                                                                                                                                     |                 |  |                                       |                          |
| 20 | Eu devo lavar as frutas com água e colocar de "molho" no vinagre para matar os vermes. / <i>I should wash the fruit with water and vinegar to kill the germs.</i>                                                                                                                      |                 |  |                                       |                          |
| 21 | Eu acho que os alimentos já cozidos não podem ser contaminados. / <i>I believe that cooked food cannot be contaminated.</i>                                                                                                                                                            |                 |  |                                       |                          |
| 22 | Eu posso armazenar os alimentos com os produtos de limpeza que não possuem cheiro. / <i>I can store food with cleaning products that do not have odor.</i>                                                                                                                             |                 |  |                                       |                          |
| 23 | Eu lavo as mãos antes de tocar nos alimentos crus. / <i>I must wash my hands before touching raw food.</i>                                                                                                                                                                             |                 |  |                                       |                          |
| 24 | Eu lavo as mãos sempre antes de tocar nos alimentos cozidos. / <i>I must always wash and disinfect my hands before touching cooked food.</i>                                                                                                                                           |                 |  |                                       |                          |
| 25 | Eu lavo as mãos sempre antes de ir ao banheiro. / <i>I must always wash my hands before going to the bathroom.</i>                                                                                                                                                                     |                 |  |                                       |                          |
| 26 | Eu lavo as mãos sempre depois de usar o banheiro. / <i>I must always wash and disinfect my hands after going to the bathroom.</i>                                                                                                                                                      |                 |  |                                       |                          |
| 27 | Eu uso o uniforme completo quando eu preparo ou distribuo os alimentos. / <i>I must wear the full uniform when I prepare or serve food.</i>                                                                                                                                            |                 |  |                                       |                          |
| 28 | Eu leio o rótulo dos alimentos antes de prepará-los. / <i>I must read food labels before preparing meals.</i>                                                                                                                                                                          |                 |  |                                       |                          |

|    |                                                                                                                                                               |  |  |  |  |  |
|----|---------------------------------------------------------------------------------------------------------------------------------------------------------------|--|--|--|--|--|
| 29 | Eu leio o prazo de validade dos alimentos antes de prepará-los. / <i>I check ingredients' shelf life before preparing meals .</i>                             |  |  |  |  |  |
| 30 | Eu olho se embalagens dos alimentos estão rasgadas/abertas antes de prepará-los. / <i>I check if ingredients packages are damaged before preparing meals.</i> |  |  |  |  |  |
| 31 | Eu uso o hipoclorito de sódio (água sanitária) na lavagem das frutas. / <i>I use sodium hypochlorite in fruit sanitation.</i>                                 |  |  |  |  |  |
| 32 | Eu posso recongelar os alimentos que foram descongelados. / <i>I can refreeze food that has been thawed.</i>                                                  |  |  |  |  |  |
| 33 | Eu converso com meus colegas durante a preparação dos alimentos. / <i>I talk to my colleagues while preparing food.</i>                                       |  |  |  |  |  |

**Table S3.** Perception of Occupational Risks by Food Handlers (Brazilian-Portuguese / English).

| Percepção dos riscos ocupacionais / <i>Perception of occupational risks</i> |                                                                                                                                                                                                           | Discordo<br>totalment<br>e<br><i>/ I totally<br/>disagree</i> | Discordo<br>parcialment<br>e<br><i>/ I partially<br/>disagree</i> | Não<br>concordo<br>e nem<br>discordo<br><i>/ I<br/>neither<br/>agree nor<br/>disagree</i> | Concordo<br>parcialment<br>e<br><i>/ I partially<br/>agree</i> | Concordo<br>totalment<br>e<br><i>/ I totally<br/>agree</i> |
|-----------------------------------------------------------------------------|-----------------------------------------------------------------------------------------------------------------------------------------------------------------------------------------------------------|---------------------------------------------------------------|-------------------------------------------------------------------|-------------------------------------------------------------------------------------------|----------------------------------------------------------------|------------------------------------------------------------|
| 1.                                                                          | Eu sei o que fazer em casos de acidentes de trabalho na UAN Escolar. / <i>I know what to do in case of accidents at work at the school foodservice.</i>                                                   |                                                               |                                                                   |                                                                                           |                                                                |                                                            |
| 2.                                                                          | Eu recebo touca, calça comprida, sapato fechado antiderrapante e avental da empresa. / <i>I receive a cap, long pants, non-slip closed shoes and an apron.</i>                                            |                                                               |                                                                   |                                                                                           |                                                                |                                                            |
| 3.                                                                          | Eu tenho dificuldade de utilizar touca, calça comprida, sapato fechado antiderrapante e avental. / <i>I have difficulty using a cap, long pants, non-slip closed shoes and an apron.</i>                  |                                                               |                                                                   |                                                                                           |                                                                |                                                            |
| 4.                                                                          | Eu recebo luvas de proteção contra o calor para retirar os alimentos do forno ou pegar nas panelas quentes. / <i>I get heat protection gloves for taking food out of the oven or picking up hot pans.</i> |                                                               |                                                                   |                                                                                           |                                                                |                                                            |
| 5.                                                                          | Eu recebo protetor auricular para proteger meus ouvidos dos barulhos da UAN Escolar. / <i>I get ear plugs to protect my ears from the noise of school foodservice.</i>                                    |                                                               |                                                                   |                                                                                           |                                                                |                                                            |
| 6.                                                                          | Eu recebo luvas de malha de aço para "tratar" as carnes, os peixes e o frango. / <i>I get steel mesh gloves to clean and cut meats.</i>                                                                   |                                                               |                                                                   |                                                                                           |                                                                |                                                            |
| 7.                                                                          | Meu trabalho prejudica a minha saúde. / <i>My work damages my health.</i>                                                                                                                                 |                                                               |                                                                   |                                                                                           |                                                                |                                                            |

|     |   |                                                                                                                                                                                                                                                          |  |  |  |  |  |
|-----|---|----------------------------------------------------------------------------------------------------------------------------------------------------------------------------------------------------------------------------------------------------------|--|--|--|--|--|
| 8.  | M | A claridade da UAN me ajuda a preparar os alimentos e a limpar a área com facilidade./ <i>The food service light helps me to prepare food and clean the area easily.</i>                                                                                 |  |  |  |  |  |
| 9.  |   | O calor da UAN Escolar me incomoda durante o preparo dos alimentos e/ou a limpeza da área. / <i>The kitchen's light helps me prepare food and easily clean the area.</i>                                                                                 |  |  |  |  |  |
| 10. |   | O barulho dos equipamentos da UAN Escolar atrapalha meu trabalho. / <i>The noise of the kitchen equipment interferes with my work.</i>                                                                                                                   |  |  |  |  |  |
| 11. |   | Eu sinto dores nas costas ou nos ombros ou nos punhos ou nas pernas e ou nos braços após o dia de trabalho. / <i>I feel pain in my back or shoulders or wrists or legs and/or arms after a work day</i>                                                  |  |  |  |  |  |
| 12. |   | Sempre que estou com dores nas costas, nos ombros, nos punhos, nas pernas e nos braços apresento atestado médico. / <i>Whenever I have pain in my back, shoulders, wrists, legs and arms, I present a medical certificate and I am absent from work.</i> |  |  |  |  |  |
| 13. |   | Eu sinto dores de cabeça por causa do calor da UAN Escolar. / <i>I get headaches because of the heat in the kitchen</i>                                                                                                                                  |  |  |  |  |  |
| 14. |   | Eu tenho dificuldades para dormir ou insônia / <i>I have difficulty sleeping or insomnia</i>                                                                                                                                                             |  |  |  |  |  |
| 15. |   | O barulho da UAN Escolar me deixa dores de cabeça. / <i>The noise from the school foodservice gives me headaches.</i>                                                                                                                                    |  |  |  |  |  |
| 16. |   | Eu me sinto cansada após um dia de trabalho na UAN Escolar. / <i>I feel tired after a day of work at the school foodservice</i>                                                                                                                          |  |  |  |  |  |

**Table S4.** Occupational Risk Mapping (Brazilian-Portuguese)

|   | RISCOS FÍSICOS / <i>PHYSICAL RISKS</i>                                                                                                                                                                                                                                                 | M1 | M2 | M3 | MÉDIA<br><i>Mean</i> | AD | NÃO /<br>NO<br>AD | NA |
|---|----------------------------------------------------------------------------------------------------------------------------------------------------------------------------------------------------------------------------------------------------------------------------------------|----|----|----|----------------------|----|-------------------|----|
| 1 | Verificar a temperatura ambiente com o termo-higrômetro (TGBU) na área de armazenamento dos alimentos em temperatura ambiente (Protocolo 1). / <i>Check the room temperature with the thermo-hygrometer in the food storage area at room temperature (Protocol 1).</i>                 |    |    |    |                      |    |                   |    |
| 2 | Verificar a umidade ambiente com o termo-higrômetro (TGBU) na área de armazenamento dos alimentos em temperatura ambiente (Protocolo 1). / <i>Check the room humidity with the thermo-hygrometer in the food storage area at room temperature (Protocol 1).</i>                        |    |    |    |                      |    |                   |    |
| 3 | Verificar a temperatura ambiente com o termo-higrômetro (TGBU) na área utilizada para o armazenamento dos alimentos na cadeia fria (Protocolo 1). / <i>Check the ambience temperature with the thermo-hygrometer in the area used for storing food in the cold chain (Protocol 1).</i> |    |    |    |                      |    |                   |    |
| 4 | Verificar a umidade ambiente com o termo-higrômetro (TGBU) na área utilizada para o armazenamento dos alimentos na cadeia fria (Protocolo 1). / <i>Check the room humidity with the thermo-hygrometer in the area used for storing food in the cold chain (Protocol 1).</i>            |    |    |    |                      |    |                   |    |

|    |                                                                                                                                                                                                                                                                                                                                       |  |  |  |  |  |  |
|----|---------------------------------------------------------------------------------------------------------------------------------------------------------------------------------------------------------------------------------------------------------------------------------------------------------------------------------------|--|--|--|--|--|--|
| 5  | Verificar a temperatura ambiente com o termo-higrômetro (TGBU) na área utilizada para o pré-preparo das hortaliças (Protocolo 1). / <i>Check the room temperature with the thermo-hygrometer in the area used for the pre-preparation of vegetables (Protocol 1).</i>                                                                 |  |  |  |  |  |  |
| 6  | Verificar a umidade ambiental com o termo-higrômetro (TGBU) na área de higienização das hortaliças (Protocolo 1). / <i>Check the room humidity with the thermo-hygrometer in the vegetable sanitation area (Protocol 1).</i>                                                                                                          |  |  |  |  |  |  |
| 7  | Verificar os níveis de ruídos com o decibelímetro na área de higienização das hortaliças (Protocolo 1). / <i>Check the noise levels with the decibel meter in the vegetable sanitation area (Protocol 1).</i>                                                                                                                         |  |  |  |  |  |  |
| 8  | Verificar a temperatura ambiente com o termo-higrômetro (TGBU) na área onde percebe-se a exposição solar na área de pré-preparo das hortaliças (Protocolo 1). / <i>Check the room temperature with the thermo-hygrometer in the area where sun exposure is perceived in vegetables' pre-preparation area (Protocol 1).</i>            |  |  |  |  |  |  |
| 9  | Verificar a temperatura ambiente com o termo-higrômetro (TGBU) na área utilizada para o pré-preparo das carnes (Protocolo 1). / <i>Check the room temperature with the thermo-hygrometer in the area used for the pre-preparation of meat (Protocol 1).</i>                                                                           |  |  |  |  |  |  |
| 10 | Verificar a umidade ambiente com o termo-higrômetro (TGBU) na área utilizada para o pré-preparo das carnes (Protocolo 1). / <i>Check the room humidity with the thermo-hygrometer in the area used for the pre-preparation of meat (Protocol 1).</i>                                                                                  |  |  |  |  |  |  |
| 11 | Verificar os níveis de ruídos com o decibelímetro (TGBU) na área utilizada para o pré-preparo das carnes (Protocolo 1). / <i>Check the noise level with the decibel meter in the area used for the pre-preparation of meat (Protocol 1).</i>                                                                                          |  |  |  |  |  |  |
| 12 | Verificar a temperatura ambiente com o termo-higrômetro (TGBU) na área utilizada para o pré-preparo dos grãos (Protocolo 1). / <i>Check the room temperature with the thermo-hygrometer in the area used for grains' pre-preparation (Protocol 1).</i>                                                                                |  |  |  |  |  |  |
| 13 | Verificar a umidade ambiente com o termo-higrômetro (TGBU) na área utilizada para o pré-preparo dos grãos (Protocolo 1). / <i>Check the room humidity with the thermo-hygrometer in the area used for the grains' pre-preparation (Protocol 1).</i>                                                                                   |  |  |  |  |  |  |
| 14 | Verificar os níveis de ruído com o decibelímetro na área utilizada para o pré-preparo dos grãos(Protocolo 1). / <i>Check the noise levels with the sound meter in the area used for the grains' pre-preparation (Protocol 1).</i>                                                                                                     |  |  |  |  |  |  |
| 15 | Verificar a temperatura ambiente com o termo-higrômetro (TGBU) durante o preparo dos alimentos entre a "fonte de calor" e a parte do corpo mais afetada (Protocolo 1). / <i>Check the temperature with a thermo-hygrometer during food preparation between the "heat source" and the most affected part of the body (Protocol 1).</i> |  |  |  |  |  |  |
| 16 | Verificar a umidade ambiente com o termo-higrômetro (TGBU) na área de preparo dos alimentos (Protocolo 1). / <i>Check the ambient humidity with the thermo-hygrometer in the food preparation area (Protocol 1).</i>                                                                                                                  |  |  |  |  |  |  |
| 17 | Verificar o ruído na UAN durante o preparo dos alimentos através do decibelímetro e registre,conforme o protocolo 1. / <i>Check the noise in the kitchen during food preparation using the sound meter and record it, according to protocol 1.</i>                                                                                    |  |  |  |  |  |  |
| 18 | Verificar a temperatura ambiente com o termo-higrômetro (TGBU) na área onde percebe-se a exposição solar na área de preparo dos alimentos (Protocolo 1). / <i>Check the room temperature with the thermo-hygrometer in the area where exposure to the sun is perceived in the food preparation area (Protocol 1).</i>                 |  |  |  |  |  |  |

|                                         |                                                                                                                                                                                                                                                                                                                       |           |           |           |                       |           |                            |           |
|-----------------------------------------|-----------------------------------------------------------------------------------------------------------------------------------------------------------------------------------------------------------------------------------------------------------------------------------------------------------------------|-----------|-----------|-----------|-----------------------|-----------|----------------------------|-----------|
| 19                                      | Verificar a temperatura ambiental com o termo-higrômetro (TGBU) durante a distribuição dos alimentos (Protocolo 1). / <i>Check the room temperature with the thermo-hygrometer during food distribution (Protocol 1).</i>                                                                                             |           |           |           |                       |           |                            |           |
| 20                                      | Verificar o ruído na UAN durante a distribuição dos alimentos através do decibelímetro (Protocolo 1). / <i>Check the noise at the school foodservice during food distribution using the sound meter (Protocol 1).</i>                                                                                                 |           |           |           |                       |           |                            |           |
| 21                                      | Verificar a umidade ambiental com o termo-higrômetro (TGBU) na área de distribuição dos alimentos (Protocolo 1). / <i>Check the room humidity with a thermo-hygrometer in the food distribution area (Protocol 1).</i>                                                                                                |           |           |           |                       |           |                            |           |
| 22                                      | Verificar a temperatura ambiental com o termo-higrômetro (TGBU) na área onde percebe-se a exposição solar na área de distribuição dos alimentos (Protocolo 1). / <i>Check the room temperature with the thermo-hygrometer in the area where sun exposure is perceived in the food distribution area (Protocol 1).</i> |           |           |           |                       |           |                            |           |
| 23                                      | Verificar a temperatura ambiental com o termo-higrômetro (TGBU) na área de lavagem dos utensílios (Protocolo 1). / <i>Check the room temperature with the thermo-hygrometer in the utensils washing area (Protocol 1).</i>                                                                                            |           |           |           |                       |           |                            |           |
| 24                                      | Verificar a umidade ambiental com o termo-higrômetro (TGBU) na área de lavagem dos utensílios (Protocolo 1). / <i>Check the room humidity with the thermo-hygrometer in the utensils washing area (Protocol 1).</i>                                                                                                   |           |           |           |                       |           |                            |           |
| 25                                      | Verificar os níveis de ruídos com o decibelímetro na área de lavagem dos utensílios (Protocolo 1). / <i>Check the noise levels with the sound meter in the utensils washing area (Protocol 1).</i>                                                                                                                    |           |           |           |                       |           |                            |           |
| 26                                      | Verificar se a disposição da área de ventilação da UAN oferece conforto térmico para os trabalhadores. / <i>Check if the ventilation of the school foodservice provides thermal comfort for workers.</i>                                                                                                              |           |           |           |                       |           |                            |           |
| 27                                      | Verificar se a configuração geométrica da UAN minimiza os ruídos da UAN e oferece conforto acústico aos trabalhadores. / <i>Check if the geometric configuration of the school foodservice minimizes school foodservice noise and offers workers' acoustic comfort.</i>                                               |           |           |           |                       |           |                            |           |
| 28                                      | Verificar se a UAN encontra-se na posição nascente, favorecendo ao conforto térmico aos trabalhadores. / <i>Check if the school foodservice is in the nascent position, favoring workers' thermal comfort.</i>                                                                                                        |           |           |           |                       |           |                            |           |
| <b>RISCOS QUÍMICOS / CHEMICAL RISKS</b> |                                                                                                                                                                                                                                                                                                                       | <b>M1</b> | <b>M2</b> | <b>M3</b> | <b>MÉDIA<br/>Mean</b> | <b>AD</b> | <b>NÃO /<br/>NO<br/>AD</b> | <b>NA</b> |
| 29                                      | A UAN dispõe de certificados de desinsetização e desratização de acordo com a periodicidade exigida pela legislação. / <i>The foodservice has disinsectization and rat extermination certificates in accordance with the frequency required by law.</i>                                                               |           |           |           |                       |           |                            |           |
| 30                                      | Os produtos químicos estão armazenados em áreas destinadas exclusivamente para esse fim. / <i>Chemical products are stored in areas designed exclusively for this purpose.</i>                                                                                                                                        |           |           |           |                       |           |                            |           |
| 31                                      | Se não houver área específica para o armazenamento dos produtos de limpeza, os mesmos estão armazenados em armários diferentes dos alimentos na UAN. / <i>If there is no specific area for the storage of cleaning products, are they stored in cabinets other than the food?</i>                                     |           |           |           |                       |           |                            |           |

|    |                                                                                                                                                                                                                                                                                                                                                                    |           |           |           |                       |           |                            |           |
|----|--------------------------------------------------------------------------------------------------------------------------------------------------------------------------------------------------------------------------------------------------------------------------------------------------------------------------------------------------------------------|-----------|-----------|-----------|-----------------------|-----------|----------------------------|-----------|
| 32 | Os produtos químicos (raticidas, desinfetantes e desodorizadores) são armazenados na UAN. / <i>Chemicals (rodenticides, disinfectants and deodorizers) are stored in the kitchen.</i>                                                                                                                                                                              |           |           |           |                       |           |                            |           |
| 33 | Os funcionários utilizam luvas de PVC para manipular produtos químicos, como hipoclorito de sódio e os desinfetantes na UAN. / <i>Employees wear PVC gloves to handle chemicals such as sodium hypochlorite and disinfectants in the kitchen.</i>                                                                                                                  |           |           |           |                       |           |                            |           |
| 34 | Os funcionários utilizam óculos de policarbonato para manipular produtos químicos, como hipoclorito de sódio e os desinfetantes na UAN. / <i>Employees wear polycarbonate glasses to handle chemicals such as sodium hypochlorite and disinfectants.</i>                                                                                                           |           |           |           |                       |           |                            |           |
| 35 | É utilizado o cloro em pó ou líquido ou pastilhas para a sanitização dos alimentos. / <i>Chlorine powder, liquid or tablets is used to sanitize food.</i>                                                                                                                                                                                                          |           |           |           |                       |           |                            |           |
| 36 | É utilizado o cloro líquido para a sanitização dos alimentos e dos utensílios. / <i>Liquid chlorine is used to sanitize food and utensils.</i>                                                                                                                                                                                                                     |           |           |           |                       |           |                            |           |
| 37 | São utilizados desincrustantes, detergentes (ácidos e alcalinos) e secantes para a higienização dos equipamentos e utensílios / <i>Descalers, detergents (acid and alkaline) and driers are used to sanitize equipment and utensils</i>                                                                                                                            |           |           |           |                       |           |                            |           |
| 38 | Existe máquina automatizada para a lavagem dos utensílios (talheres, bandejas, estampadas, pratos, etc.) utilizados pelos comensais. / <i>There is an automated machine for washing utensils (cutlery, trays, plates, etc.) used by diners.</i>                                                                                                                    |           |           |           |                       |           |                            |           |
| 39 | Os manipuladores usam luvas de PVC para higienização, quando utilizam desincrustantes, detergentes (ácidos e alcalinos) e secantes para a higienização dos equipamentos e utensílios. / <i>Handlers use PVC gloves for sanitizing, and when they use descalers, detergents (acid and alkaline) and driers to sanitize equipment and utensils.</i>                  |           |           |           |                       |           |                            |           |
| 40 | Os manipuladores usam óculos de policarbonato para higienização, quando utilizam desincrustantes, detergentes (ácidos e alcalinos) e secantes para a higienização dos equipamentos e utensílios. / <i>Handlers use polycarbonate glasses for cleaning, and when they use descalers, detergents (acid and alkaline) and driers to clean equipment and utensils.</i> |           |           |           |                       |           |                            |           |
|    | <b>RISCOS BIOLÓGICOS / BIOLOGICAL RISKS</b>                                                                                                                                                                                                                                                                                                                        | <b>M1</b> | <b>M2</b> | <b>M3</b> | <b>MÉDIA<br/>Mean</b> | <b>AD</b> | <b>NÃO /<br/>NO<br/>AD</b> | <b>NA</b> |
| 41 | Os vegetais não higienizados são armazenados dentro da área de pré-preparo e preparo dos alimentos. / <i>Unsanitized vegetables are stored inside the food preparation area.</i>                                                                                                                                                                                   |           |           |           |                       |           |                            |           |
| 42 | Presença de moscas, baratas e roedores na UAN. / <i>Presence of insects and rodents in the kitchen area.</i>                                                                                                                                                                                                                                                       |           |           |           |                       |           |                            |           |
| 43 | Presença de animais pombos, cães, gatos, etc. na UAN. / <i>Presence of animals like pigeons, dogs, cats, etc. in the kitchen area.</i>                                                                                                                                                                                                                             |           |           |           |                       |           |                            |           |
| 44 | As lixeiras têm acionamento da tampa com pedal. / <i>Dumpsters with pedal-operated lid.</i>                                                                                                                                                                                                                                                                        |           |           |           |                       |           |                            |           |
| 45 | A lixeira permanece fechada durante o preparo dos alimentos na UAN. / <i>The trash can remains closed while preparing meals in the kitchen.</i>                                                                                                                                                                                                                    |           |           |           |                       |           |                            |           |
| 46 | A lixeira permanece fechada durante a distribuição dos alimentos na UAN. / <i>The trash can remains closed during the distribution of meals at the school foodservice.</i>                                                                                                                                                                                         |           |           |           |                       |           |                            |           |
| 47 | Os funcionários higienizam as mãos durante as etapas de pré-preparo, preparo e distribuição dos alimentos na UAN. / <i>Employees clean their hands during the pre-preparation, preparation and distribution of food at the foodservice.</i>                                                                                                                        |           |           |           |                       |           |                            |           |

|                                                    |                                                                                                                                                                                                                                                                         |           |           |           |                       |           |                            |           |
|----------------------------------------------------|-------------------------------------------------------------------------------------------------------------------------------------------------------------------------------------------------------------------------------------------------------------------------|-----------|-----------|-----------|-----------------------|-----------|----------------------------|-----------|
| 48                                                 | Os funcionários utilizam as luvas de PVC para manipular e/ou higienizar as hortaliças não higienizadas. / <i>Employees use PVC gloves to handle and/or sanitize unsanitary vegetables.</i>                                                                              |           |           |           |                       |           |                            |           |
| 49                                                 | Os funcionários utilizam luvas de PVC ou luvas descartáveis para o descarte dos restos alimentares dos pratos dos comensais. / <i>Employees use PVC gloves or disposable gloves to dispose food residues from diners' plates.</i>                                       |           |           |           |                       |           |                            |           |
| 50                                                 | Os funcionários utilizam luvas de PVC, botas, aventais e máscaras para a higienização das áreas onde estão armazenados o lixo. / <i>Employees use PVC gloves, boots, aprons and masks to clean the areas where garbage is stored.</i>                                   |           |           |           |                       |           |                            |           |
| 51                                                 | Existem ventiladores ou circuladores de ar nas áreas de armazenamento, pré-preparo e preparo dos alimentos. / <i>There are fans or air circulators in the food storage and cooking areas.</i>                                                                           |           |           |           |                       |           |                            |           |
| 52                                                 | Existe a presença de umidificadores de ar nas áreas de armazenamento, pré-preparo e preparo dos alimentos. / <i>There is air humidifiers in the storage, pre-preparation and food preparation areas.</i>                                                                |           |           |           |                       |           |                            |           |
| 53                                                 | Os funcionários utilizam luvas de PVC para o descarte do lixo na UAN. / <i>Employees use PVC gloves to dispose of waste.</i>                                                                                                                                            |           |           |           |                       |           |                            |           |
| <b>RISCOS ERGONÔMICOS / <i>ERGONOMIC RISKS</i></b> |                                                                                                                                                                                                                                                                         | <b>M1</b> | <b>M2</b> | <b>M3</b> | <b>MÉDIA<br/>Mean</b> | <b>AD</b> | <b>NÃO /<br/>NO<br/>AD</b> | <b>NA</b> |
| 54                                                 | A Instituição implantou a ginástica laboral para os funcionários da UAN. / <i>The Institution implemented labor gymnastics for foodservice employees.</i>                                                                                                               |           |           |           |                       |           |                            |           |
| 55                                                 | Os funcionários realizam ginástica laboral durante a jornada de trabalho. / <i>Employees perform labor gymnastics during working days.</i>                                                                                                                              |           |           |           |                       |           |                            |           |
| 56                                                 | Os funcionários realizam rodízio de atividades para evitar movimentos repetitivos. / <i>Employees rotate activities to avoid repetitive movements.</i>                                                                                                                  |           |           |           |                       |           |                            |           |
| 57                                                 | Os funcionários utilizam coletes de proteção lombar/abdominal para carregar volumes pesados. / <i>Employees wear lumbar/abdominal protection vests to carry heavy volumes.</i>                                                                                          |           |           |           |                       |           |                            |           |
| 58                                                 | Os uniformes favorecem ao conforto dos funcionários no ambiente de trabalho. / <i>Uniforms favor the comfort of employees in the work environment.</i>                                                                                                                  |           |           |           |                       |           |                            |           |
| 59                                                 | A UAN possui descanso bancos semissentados para as atividades de catação de grãos. / <i>The foodservice has semi-seated benches for grain collection activities.</i>                                                                                                    |           |           |           |                       |           |                            |           |
| 60                                                 | Na UAN utilizam-se equipamentos para a higienização tipo "mop" para evitar a curvatura do corpo do funcionário durante essa etapa. / <i>In the foodservice, "mop" type cleaning equipment is used to prevent the employee's body from bending during this stage.</i>    |           |           |           |                       |           |                            |           |
| 61                                                 | Os funcionários utilizam carrinhos de transporte para o trânsito de volumes pesados. / <i>Employees use transport carts for the transit of heavy volumes.</i>                                                                                                           |           |           |           |                       |           |                            |           |
| 62                                                 | Os alimentos estão armazenados em armários, bancadas e/ ou prateleiras que não exigem esforço físico dos funcionários para retirá-los. / <i>Food is stored in cabinets, countertops and/or shelves that do not require physical effort from employees to remove it.</i> |           |           |           |                       |           |                            |           |

|    |                                                                                                                                                                                                                                                                                                         |           |           |           |                       |           |                            |
|----|---------------------------------------------------------------------------------------------------------------------------------------------------------------------------------------------------------------------------------------------------------------------------------------------------------|-----------|-----------|-----------|-----------------------|-----------|----------------------------|
| 63 | Verificar a altura das bancadas de pré-preparo dos alimentos na UAN e registre em formulário específico (Protocolo 2). / <i>Check the height of the food pre-preparation benches at the foodservice and record it in a specific form (Protocol 2).</i>                                                  |           |           |           |                       |           |                            |
| 64 | Verificar a altura das bancadas utilizadas para o preparo dos alimentos na UAN e registre em formulário específico, (Protocolo 2). / <i>Check the height of the benches used to prepare food at the foodservice and record it in a specific form (Protocol 2).</i>                                      |           |           |           |                       |           |                            |
| 65 | Verificar a altura das bancadas utilizadas para a higienização das hortaliças na UAN e registre em formulário específico, (Protocolo 2). / <i>Check the height of the benches used to clean vegetables in the foodservice and record it in a specific form (Protocol 2).</i>                            |           |           |           |                       |           |                            |
| 66 | Verificar a altura entre o piso e os armários e prateleiras fixados na parte superior das paredes (Protocolo 2) / <i>Check the height between the floor and the cabinets and shelves fixed to the top of the walls (Protocol 2).</i>                                                                    |           |           |           |                       |           |                            |
| 67 | Verificar o peso e a altura dos funcionários e registre em formulário específico (Protocolo 3). / <i>Check the weight and height of employees and record it in a specific form (Protocol 3).</i>                                                                                                        |           |           |           |                       |           |                            |
|    | <b>RISCOS DE ACIDENTES / ACCIDENT RISKS</b>                                                                                                                                                                                                                                                             | <b>M1</b> | <b>M2</b> | <b>M3</b> | <b>MÉDIA<br/>Mean</b> | <b>AD</b> | <b>NÃO /<br/>NO<br/>AD</b> |
| 68 | Na UAN os funcionários se locomovem sem a presença de obstáculos ocasionados por equipamentos, móveis e utensílios. / <i>At the foodservice, employees move around without the presence of obstacles caused by equipment, furniture and utensils.</i>                                                   |           |           |           |                       |           |                            |
| 69 | A estrutura física da UAN permite que os funcionários se locomovam sem a presença de obstáculos (colunas e degraus). / <i>The foodservice's physical structure allows employees to move around without obstacles (columns and steps).</i>                                                               |           |           |           |                       |           |                            |
| 70 | Na UAN existem extintores das classe C (equipamentos elétricos e líquidos inflamáveis). / <i>In the foodservice, there are class C fire extinguishers (electrical equipment and flammable liquids).</i>                                                                                                 |           |           |           |                       |           |                            |
| 71 | Na UAN existem extintores das classes K (chamas produzidas por óleos e gorduras). / <i>In the foodservice, there are class K fire extinguishers (flames produced by oils and fats).</i>                                                                                                                 |           |           |           |                       |           |                            |
| 72 | O piso da UAN é antiderrapante e/ ou existe a presença de fitas antiderrapantes. / <i>The foodservice floor is non-slippery and/or there is the presence of non-slippery tapes.</i>                                                                                                                     |           |           |           |                       |           |                            |
| 73 | Os utensílios manuais, como facas, cortadores de legumes e amaciadores de carnes estão em bom estado de conservação. / <i>Hand tools such as knives, vegetable cutters and meat tenderizers are in good condition.</i>                                                                                  |           |           |           |                       |           |                            |
| 74 | Os utensílios manuais, como facas, cortadores de legumes e amaciadores de carnes são acondicionados em suporte próprios para evitar acidentes de trabalho. / <i>Manual utensils, such as knives, vegetable cutters and meat tenderizers, are packed in their own support to prevent work accidents.</i> |           |           |           |                       |           |                            |
| 75 | A UAN possui máquinas e/ou equipamentos com instalação elétrica conforme as normas técnicas. / <i>The foodservice has machines and/or equipment with electrical installation according to technical standards.</i>                                                                                      |           |           |           |                       |           |                            |
| 76 | Existem instalações elétricas provisórias, com fiação não protegida. / <i>There are temporary electrical installations, with unprotected wiring.</i>                                                                                                                                                    |           |           |           |                       |           |                            |
| 77 | Cada equipamento é "plugado" em um ponto de energia independente. / <i>Each equipment is connected to an independent power point.</i>                                                                                                                                                                   |           |           |           |                       |           |                            |

|    |                                                                                                                                                                                                                                                                                                                  |  |  |  |  |  |  |
|----|------------------------------------------------------------------------------------------------------------------------------------------------------------------------------------------------------------------------------------------------------------------------------------------------------------------|--|--|--|--|--|--|
| 78 | Durante o preparo das refeições os pisos permanecem molhados e/ ou engordurados. / <i>During the preparation of meals, the floors remain wet and/or greasy.</i>                                                                                                                                                  |  |  |  |  |  |  |
| 79 | Durante a distribuição das refeições os pisos permanecem molhados e/ ou engordurados. / <i>During the distribution of meals, the floors remain wet and/or greasy.</i>                                                                                                                                            |  |  |  |  |  |  |
| 80 | Os funcionários utilizam luvas de malha de aço na etapa de pré-preparo dos produtos cárneos. / <i>Employees use steel mesh gloves in the pre-preparation of meat products.</i>                                                                                                                                   |  |  |  |  |  |  |
| 81 | Os funcionários utilizam fita anticorte durante os cortes das hortaliças. / <i>Employees use anti-cut tape when cutting vegetables.</i>                                                                                                                                                                          |  |  |  |  |  |  |
| 82 | Os funcionários utilizam calçados com certificado de aprovação (CA). / <i>Employees wear quality certified shoes</i>                                                                                                                                                                                             |  |  |  |  |  |  |
| 83 | Os funcionários utilizam aventais com certificado de aprovação (CA). / <i>Employees wear quality-certified aprons</i>                                                                                                                                                                                            |  |  |  |  |  |  |
| 84 | Os calçados e os aventais estão em perfeitas condições de uso. / <i>The shoes and aprons are in perfect working condition.</i>                                                                                                                                                                                   |  |  |  |  |  |  |
| 85 | Os funcionários utilizam óculos de segurança durante o pré-preparo dos vegetais. / <i>Employees wear safety glasses during the pre-preparation of vegetables.</i>                                                                                                                                                |  |  |  |  |  |  |
| 86 | Os funcionários utilizam óculos de segurança durante os procedimentos de fritura superficial ou por imersão. / <i>Employees wear safety glasses during shallow frying or soaking procedures.</i>                                                                                                                 |  |  |  |  |  |  |
| 87 | Os funcionários utilizam protetores auriculares na UAN. Avalie esse procedimento após a análise dos ruídos. / <i>Employees wear ear protectors at the foodservice. Evaluate this procedure after analyzing the noise.</i>                                                                                        |  |  |  |  |  |  |
| 88 | Os funcionários utilizam luvas térmicas e/ou manga e/ou mangote de lona para o manuseio de equipamentos e/ou utensílios em temperaturas acima de 200°C. / <i>Employees use thermal gloves and/or sleeves and/or canvas hose for handling equipment and/or utensils at temperatures above 200°C.</i>              |  |  |  |  |  |  |
| 89 | Percebe-se luminosidade suficiente e sem ofuscamentos na área de recepção dos alimentos dos alimentos. Verificar a luminosidade utilizando o luxímetro. / <i>Sufficient light and no glare can be seen in the food reception area. Check the brightness using the luxmeter.</i>                                  |  |  |  |  |  |  |
| 90 | Percebe-se luminosidade suficiente e sem ofuscamentos na área de armazenamento dos alimentos em temperatura ambiente. Verificar a luminosidade utilizando o luxímetro. / <i>Sufficient light and no glare can be seen in the food storage area at room temperature. Check the brightness using the luxmeter.</i> |  |  |  |  |  |  |
| 91 | Percebe-se luminosidade suficiente e sem ofuscamentos na área de armazenamento dos alimentos em cadeia de frio. Verificar a luminosidade utilizando o luxímetro. / <i>Sufficient light and no glare can be seen in the cold chain food storage area. Check the brightness using the luxmeter.</i>                |  |  |  |  |  |  |
| 92 | Percebe-se luminosidade suficiente e sem ofuscamentos nas áreas de pré-preparo das hortaliças. Verificar a luminosidade utilizando o luxímetro. / <i>Sufficient light and no glare can be seen in the pre-preparation areas of vegetables. Check the brightness using the luxmeter.</i>                          |  |  |  |  |  |  |
| 93 | Percebe-se luminosidade suficiente e sem ofuscamentos nas áreas de pré-preparo das carnes. Verificar a luminosidade utilizando o luxímetro. / <i>Sufficient light and no glare can be seen in the meat pre-preparation areas. Check the brightness using the luxmeter.</i>                                       |  |  |  |  |  |  |

|                                                                                                                                                                                                                                                                                                                                                               |                                                                                                                                                                                                                                                                       |  |  |  |  |  |  |
|---------------------------------------------------------------------------------------------------------------------------------------------------------------------------------------------------------------------------------------------------------------------------------------------------------------------------------------------------------------|-----------------------------------------------------------------------------------------------------------------------------------------------------------------------------------------------------------------------------------------------------------------------|--|--|--|--|--|--|
| 94                                                                                                                                                                                                                                                                                                                                                            | Percebe-se luminosidade suficiente e sem ofuscamentos nas áreas de preparo dos alimentos. Verificar a luminosidade utilizando o luxímetro. / <i>Sufficient light and no glare can be seen in the food preparation areas. Check the brightness using the luxmeter.</i> |  |  |  |  |  |  |
| 95                                                                                                                                                                                                                                                                                                                                                            | Percebe-se luminosidade suficiente e sem ofuscamentos nas áreas de distribuição dos alimentos. Verificar a luminosidade utilizando o luxímetro. / <i>There is sufficient light and no glare in food distribution areas. Check the brightness using the luxmeter.</i>  |  |  |  |  |  |  |
| 96                                                                                                                                                                                                                                                                                                                                                            | Existe botijão de gás na área de preparo dos alimentos na UAN / <i>There is a gas cylinder in the food cooking area.</i>                                                                                                                                              |  |  |  |  |  |  |
| 97                                                                                                                                                                                                                                                                                                                                                            | A mangueira do fogão/ botijão encontra-se dentro do prazo de validade. Registre a data do vencimento. / <i>Stove hose and gas cylinder are within the expiry date. Record expiration date</i>                                                                         |  |  |  |  |  |  |
| <p>Legenda:</p> <p>AD= Adequado / <i>Adequate</i></p> <p>NÃO AD= Não adequado / <i>Inadequate</i></p> <p>NA = Não se aplica / <i>Not applicable</i></p> <p>M1= Medida 1 – <i>Measure 1</i></p> <p>M2= Medida 2 – <i>Measure 2</i></p> <p>M3= Medida 3 - <i>Measure 3</i></p> <p>OBS: Observação / <i>Observation</i></p> <p>Avaliador / <i>Evaluator:</i></p> |                                                                                                                                                                                                                                                                       |  |  |  |  |  |  |
